# Supplementary material
Source: PubMed Central journal article supplement (PMC6688606)
Supplement: NIHMS1044210-supplement-Supplemental.pdf [file NIHMS1044210-supplement-Supplemental.pdf]

# Supplemental figures (S1-S3)

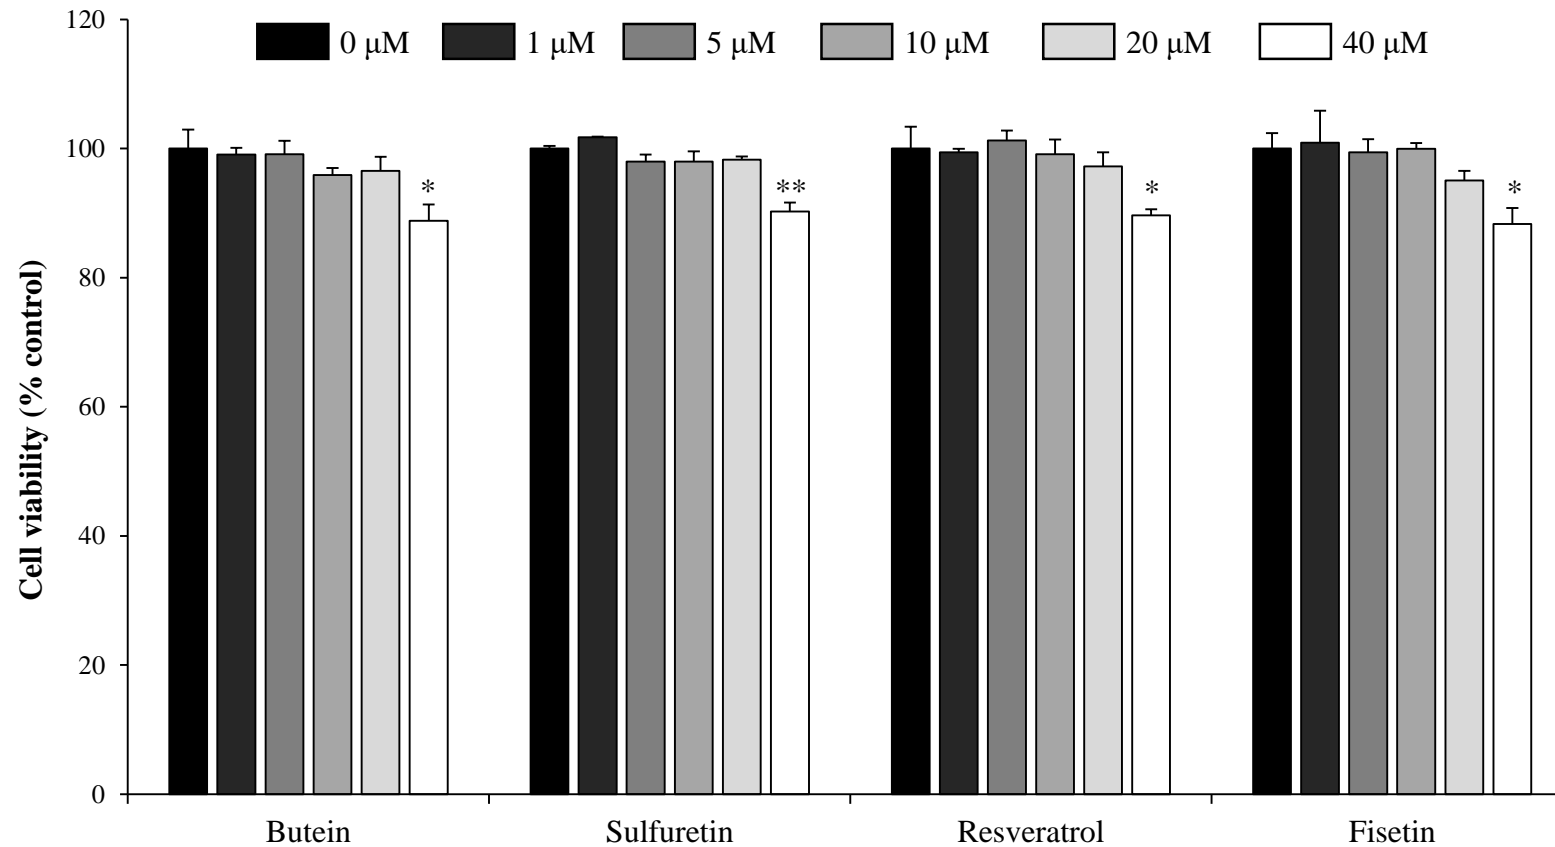

**Supplemental Figure S1. Effects of the selected phytochemicals on cell viability.** C3H10T1/2 cells were treated with dimethylsulfoxide (DMSO), butein, sulfuretin, resveratrol, or fisetin at the indicated doses for 24 hours and cell viability was determined by MTT assays. Data shown represent means  $\pm$  s.e.m. Statistical significance was determined relative to a control using Student's t-test (\* P<0.05; \*\* P<0.005).

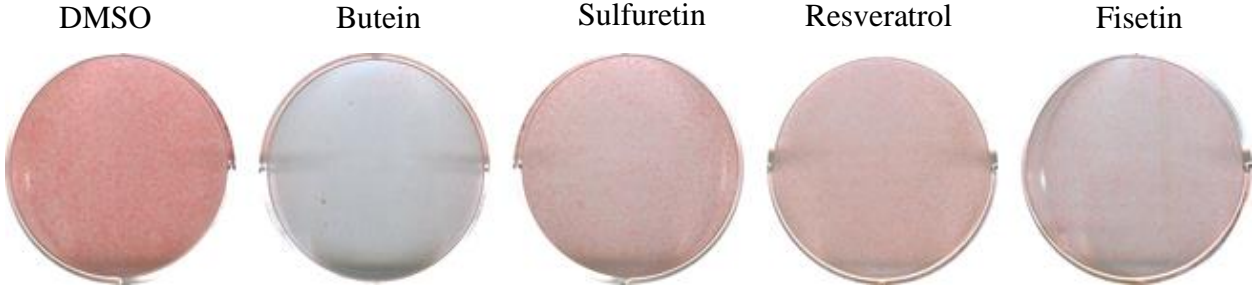

**Supplemental Figure S2.** Anti-adipogenic effects of butein, sulfuretin, resveratrol, and fisetin in 3T3-L1 cells.

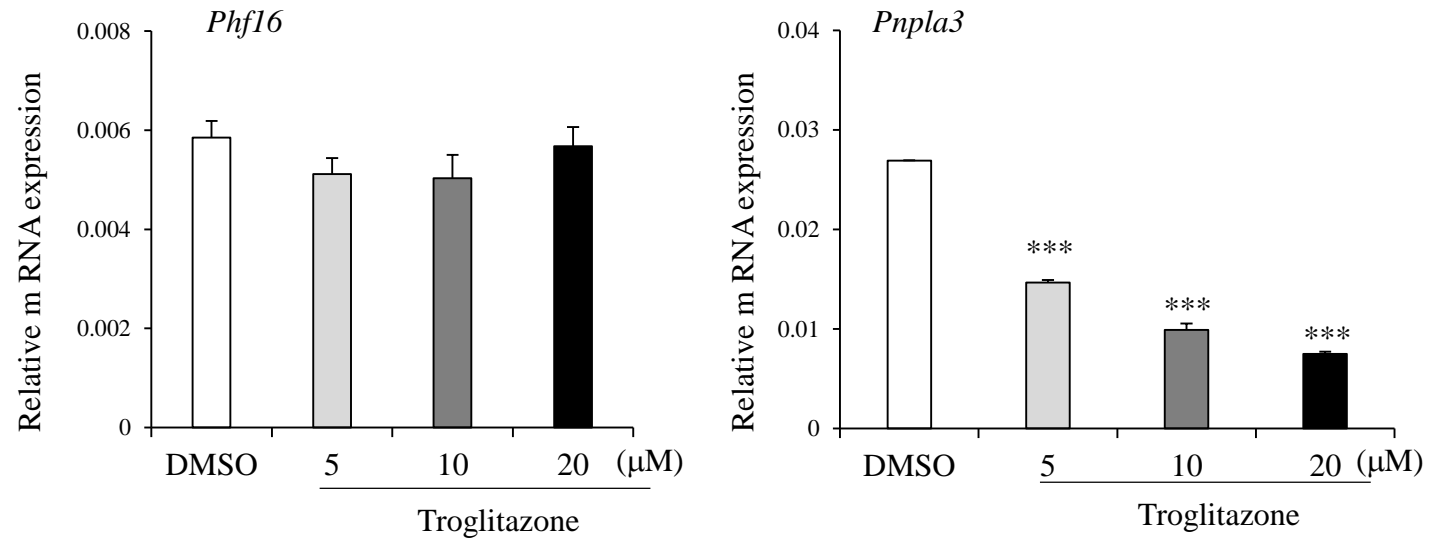

**Supplemental Figure S3.** Ppar $\gamma$  activation by troglitazone represses *Pnpla3* expression but not *Phf16*. Data shown represent means  $\pm$  s.e.m. Statistical significance was determined relative to a control using Student's t-test (\*\*\* P<0.0005).
